# Supplementary material for: Long-term exposure to Myozyme results in a decrease of anti-drug antibodies in late-onset Pompe disease patients
Source: PubMed Central journal article supplement (PMC5096052; doi:10.1038/srep36182), 2016-11-04
Supplement: srep36182-s1.pdf [file srep36182-s1.pdf]

## **Long-term exposure to Myozyme results in a decrease of anti-drug antibodies in late-onset Pompe disease patients**

Elisa Masat<sup>1</sup>, Pascal Laforêt<sup>1,2</sup>, Marie De Antonio<sup>3</sup>, Guillaume Corre<sup>4</sup>, Barbara Perniconi<sup>2</sup>, Nadjib Taouagh<sup>2</sup>, Kuberaka Mariampillai<sup>5</sup>, Damien Amelin<sup>1</sup>, Wladimir Mauhin<sup>1</sup>, Jean-Yves Hogrel<sup>6</sup>, Catherine Caillaud<sup>7</sup>, Giuseppe Ronzitti<sup>4</sup>, Francesco Puzzo<sup>4</sup>, Klaudia Kuranda<sup>1</sup>, Pasqualina Colella<sup>4</sup>, Roberto Mallone<sup>8</sup>, Olivier Benveniste<sup>1,5</sup>, Federico Mingozzi<sup>1, 4\*</sup>, French Pompe Registry Study Group<sup>#</sup>

<sup>1</sup>University Pierre and Marie Curie, INSERM, UMR974, Paris, France

<sup>2</sup>Paris-Est neuromuscular center, Institute of Myology, Pitié-Salpêtrière Hospital, AP-HP, Paris, France

<sup>3</sup>University Paris Descartes, INSERM, UMR1138, Paris, France

<sup>4</sup>Genethon, INSERM, UMR951, Evry, France

<sup>5</sup>Department of Internal Medicine and Clinical Immunology, DHUI2B, Pitié-Salpêtrière Hospital, AP-HP, Paris, France

<sup>6</sup>Neuromuscular Physiology and Evaluation Lab, Institute of Myology, Paris, France

<sup>7</sup>Department of Metabolic Biochemistry, Necker Hospital, Paris, France

<sup>8</sup>Institute Cochin, INSERM U1016, CNRS UMR8104, Paris, France; University Paris Descartes, Faculty of Medicine, Paris, France; Department of diabetology, Cochin Hospital, AP-HP, Paris, France

<sup>#</sup>Full list appears at the end of the manuscript

|         | LOPD | Age | Sex | Years of ERT | Mutations   |                             | Clinical Outcome |         |
|---------|------|-----|-----|--------------|-------------|-----------------------------|------------------|---------|
|         |      |     |     |              | Allele 1    | Allele 2                    | 6MWT (meters)    | FVC (%) |
| Treated | 1    | 69  | M   | 8            | c.-32-13T>G | c.3G>A                      | 467              | 61      |
|         | 2    | 68  | F   | 5            | c.-32-13T>G | c.1629C>G                   | 275              | 116     |
|         | 3    | 72  | F   | 4            | c.-32-13T>G | c.2481+102_2646+31del       | 264              | 56      |
|         | 4    | 50  | M   | 9            | c.-32-13T>G | c.-32-13T>G                 | 140              | 34      |
|         | 5    | 57  | M   | 2            | c.-32-13T>G | c.546+1G>T                  | 461              | 49      |
|         | 6    | 65  | M   | 8            | c.-32-13T>G | c.2481+102_2646+31del       | 95               | 36      |
|         | 7    | 58  | F   | 9            | c.-32-13T>G | c.2041-1G>A                 | N/A *            | 14      |
|         | 8    | 54  | M   | 8            | c.-32-13T>G | c.1888+1G>A                 | 300              | 33      |
|         | 9    | 34  | F   | 6            | c.1655T>C   | c.1688A>T                   | 452              | 76      |
|         | 10   | 80  | M   | 7            | c.-32-13T>G | c.1927G>A                   | 220              | 44      |
|         | 11   | 57  | M   | 9            | c.-32-13T>G | c.525del                    | 210              | 31      |
|         | 12   | 45  | M   | 5            | c.-32-13T>G | c.655G>A                    | 301              | 13      |
|         | 13   | 30  | F   | 7            | c.-32-13T>G | c.525del                    | 520              | 50      |
|         | 14   | 69  | F   | 9            | c.-32-13T>G | c.118C>T                    | 200              | 51      |
|         | 15   | 54  | F   | 8            | c.-32-13T>G | c.1717A>C                   | 229              | 39      |
|         | 16   | 61  | F   | 7            | c.-32-13T>G | c.693-1G>C                  | 392              | 52      |
|         | 17   | 49  | F   | 2            | c.-32-13T>G | c.1548G>A                   | 314              | 54      |
|         | 18   | 66  | M   | 9            | c.-32-13T>G | c.1047del                   | 290              | 45      |
|         | 19   | 57  | M   | 8            | c.-32-13T>G | c.1819_1836del <sub>1</sub> | 273              | 77      |
|         | 20   | 63  | F   | 9            | c.1748 C>T  | c.2014C>T                   | 10               | 57      |
|         | 21   | 49  | F   | 8            | c.-32-13T>G | c.1819_1836del <sub>1</sub> | N/A *            | 59      |
|         | 22   | 46  | F   | 3            | c.-32-13T>G | c.1819_1836del <sub>1</sub> | 73               | 68      |
|         | 23   | 77  | M   | 2            | c.-32-13T>G | c.925G>A                    | 120              | 40      |

|                  |    |    |   |     |             |                           |       |     |
|------------------|----|----|---|-----|-------------|---------------------------|-------|-----|
|                  | 24 | 48 | F | 9   | c.-32-13T>G | c.2481+102_2<br>646+31del | 180   | 67  |
|                  | 25 | 67 | M | 4   | c.-32-13C>G | c.-32-3C>G                | 172   | 49  |
|                  | 26 | 65 | F | 5   | c.-32-13T>G | c.1548G>A                 | N/A * | 57  |
|                  | 27 | 71 | M | 0.3 | c.-32-13T>G | c. 2608C>T                | 348   | 53  |
|                  | 28 | 49 | F | 6   | c.-32-13T>G | c.799-<br>803delinsA      | 251   | 109 |
| <b>Untreated</b> | 29 | 50 | F | N/A | c.-32-13T>G | c.2481+102_2<br>646+31del | 354   | 116 |
|                  | 30 | 37 | M | N/A | N/A         | N/A                       | 487   | 80  |
|                  | 31 | 45 | F | N/A | c.-32-13T>G | c.1636+1G>C               | 457   | 99  |
|                  | 32 | 45 | F | N/A | c.-32-13T>G | c.1888+1G>A               | 533   | 77  |
|                  | 33 | 79 | F | N/A | c.-32-13T>G | c.1560C>G                 | 312   | 113 |
|                  | 34 | 46 | M | N/A | c.-32-13T>G | c.1888+1G>A               | 383   | 73  |
|                  | 35 | 26 | M | N/A | c.-32-13T>G | c.655G>A                  | 645   | 101 |
|                  | 36 | 69 | F | N/A | c.-32-13T>G | c.854C>G                  | 252   | 87  |
|                  | 37 | 62 | F | N/A | c.-32-13T>G | c.2481+102_2<br>646+31del | 475   | 94  |
|                  | 38 | 75 | M | N/A | c.-32-13T>G | c.1560C>G                 | 246   | N/A |

N/A, not available; \*, unable to perform the test

**Supplementary Table S1. Characteristics of the study cohorts of treated and untreated LOPD subjects.** Patients ID, age of patients, sex, years of ERT, mutations (the nucleotide numbering reflects cDNA numbering with +1 corresponding to the A of the ATG initiation codon in RefSeq NM\_000152.3; the amino acid numbering is according to NP 000143.2) and clinical outcome (6MWT and FVC) at the lastest follow up visit.

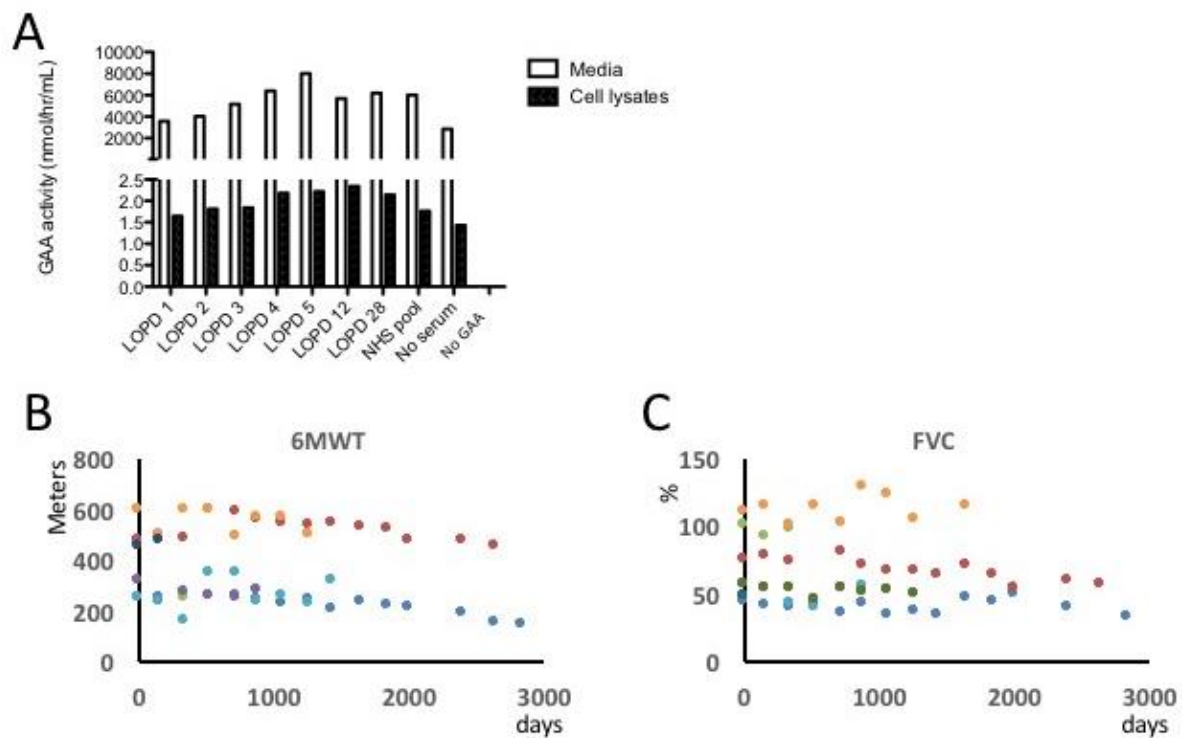

**Supplementary Figure S1. Anti-GAA neutralizing antibody assay and follow up of 6MWT and FVC in LOPD subjects with high anti-GAA IgG4 titers.** (A) GAA uptake inhibition assay, GAA activity levels are shown in medium and cell lysates following incubation of Pompe fibroblasts with GAA and LOPD sera positive for anti-GAA IgG4 (LOPD1, 2, 3, 4, 5, 12, and 28), pooled healthy donor serum samples (NHS pool), medium only (No serum). Cells incubated with medium without GAA (No GAA) were used as negative/background control. Shown is the results of one of three replicate experiments. (B) 6MWT follow up in LOPD1, 2, 3, 4, 5, 12, and 28. (C) FVC follow up in LOPD1, 2, 3, 4, 5, 12, and 28.

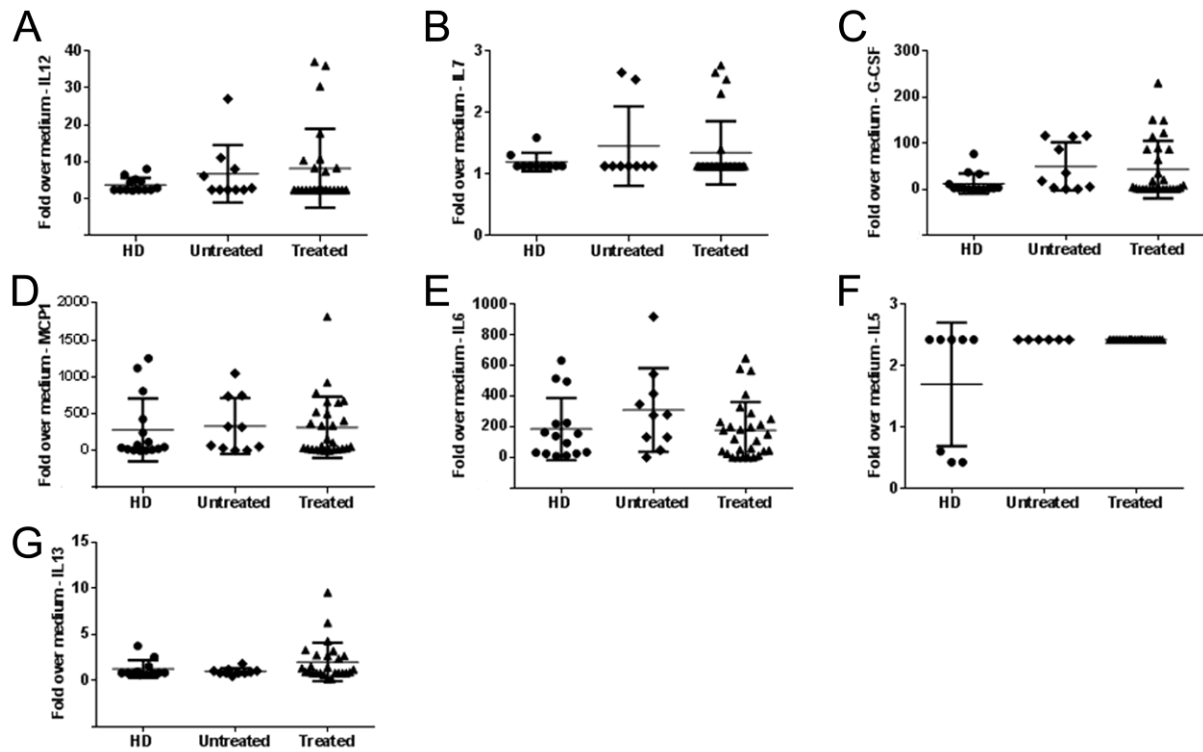

**Supplementary Figure S2. Luminex assay for cytokine and chemokine production in supernatant of PBMCs restimulated with rhGAA.** (A-G) Shown are levels of IL12, IL7, G-CSF, MCP1, IL6, IL5, and IL13. The Mann-Whitney test was used to compare data analysis across study groups.

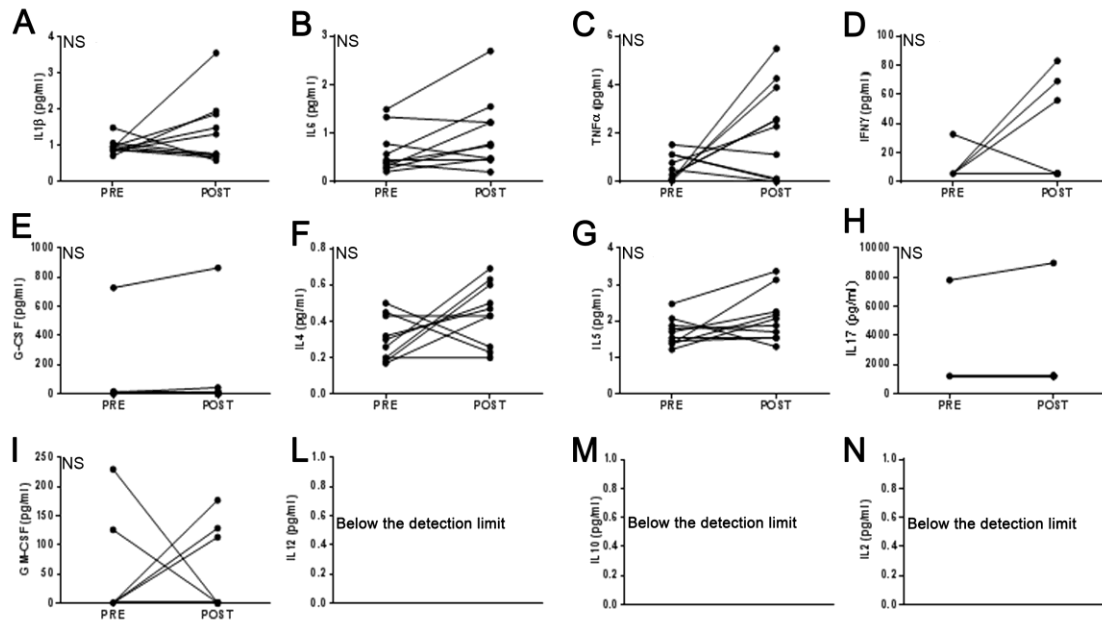

**Supplementary Figure S3. Serum cytokine and chemokine profile of LOPD subjects receiving ERT.** (A-N) Measurement of cytokines and chemokines in serum samples collected from each subject before (PRE) and at the end (POST) of rhGAA infusion. Paired t-test was used to compare data analysis PRE vs. POST infusion (NS, not significant).
